# Supplementary material
Source: Springer Nature journal article supplement (https://www.springermedizin.de/resource/supplementary/12885_2010_2601_MOESM8_ESM.pdf/9461552)

## A OSA8

|                       |   |   |   |   |
|-----------------------|---|---|---|---|
| Curcumin (10 $\mu$ M) | - | + | - | - |
| FLLL32 (10 $\mu$ M)   | - | - | + | - |
| MG132 (10 $\mu$ M)    | - | - | - | + |

IP: STAT3  
Blot: anti-Ubi

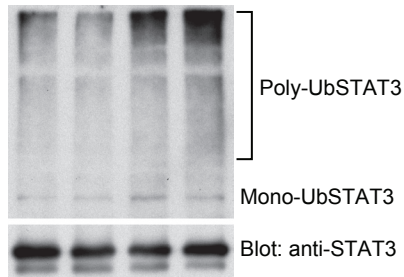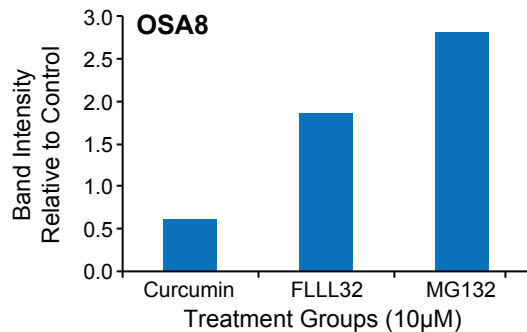

## B

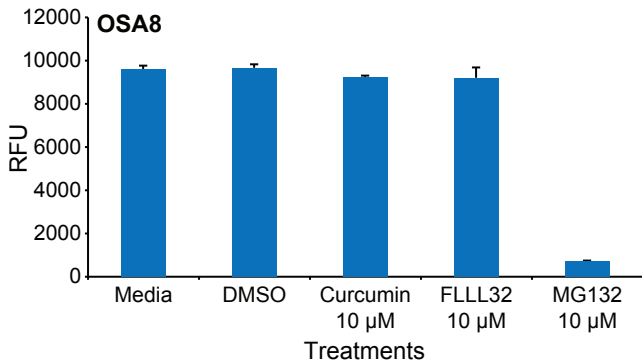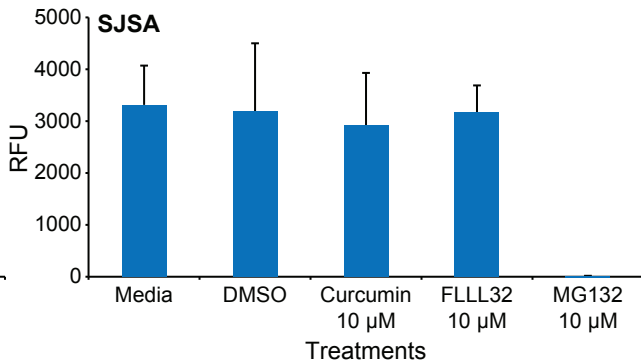

Supplement: MOESM8 [file 9461552]
